# Supplementary material for: Sesquiterpenoids from Tithonia diversifolia (Hemsl.) A. Gray induce apoptosis and inhibit the cell cycle progression of acute myeloid leukemia cells
Source: publisher site journal article supplement (doi:10.1515/znc-2021-0154), 2022-11-02
Supplement: Supplementary file 1 [file j_znc-2021-0154_suppl.docx]

**Supporting Information**

Sesquiterpenoids from *Tithonia diversifolia* (Hemsl.) A. Gray induce apoptosis and inhibit the cell cycle progression of acute myeloid leukemia cells

**Trinh Thi Thuy1,2**, Nguyen Thi Thuy Linh 1,2, Ba Thi Cham1,2, Nguyen Thi Hoang Anh1,2, Tran Duc Quan1, Nguyen Thanh Tam1,2, Le Thi Hong Nhung3, Do Thi Thao1,4**, **NguyenPhi Hung1,5, Vu Dinh Hoang6, Sabrina Adorisio7, and Domenico V Delfino 7,8***

**1**Graduate University of Science and Technology, Vietnam Academy of Science and Technology, 18 Hoang Quoc Viet, Nghia Do, Cau Giay, Ha Noi, Viet Nam

**2**Institute of Chemistry, Vietnam Academy of Science and Technology, 18 Hoang Quoc Viet, Nghia Do, Cau Giay, Ha Noi, Viet Nam

3Hanoi University of Industry, 298 Cau Dien, North District Tu Liem, Ha Noi, Viet Nam

**4**Institute of Biotechnology, Vietnam Academy of Science and Technology, 18 Hoang Quoc Viet, Nghia Do, Cau Giay, Ha Noi, Viet Nam

5Institute of Natural Products Chemistry, Vietnam Academy Science and Technology, 18 Hoang Quoc Viet, Nghia Do, Cau Giay, Ha Noi, Viet Nam

6School of Chemical Engineering, Hanoi University of Science and Technology, 1 Dai Co Viet, Hai BBa Trung, Ha Noi, Viet Nam

7Foligno Nursing School, Department of Medicine and Surgery, University of Perugia, Piazzale Severi, S. Andrea delle Fratte, 06129 Perugia, Italy

8Department of Medicine and Surgery, University of Perugia, Piazzale Severi, S. Andrea delle Fratte, 06129 Perugia, Italy

***** Email: domenico.delfino@unipg.it

****** Email: [thuy@ich.vast.vn](mailto:thuy@ich.vast.vn)

Dedication:Thanks Prof. Domenico V Delfinofor his support for our researches during his time as president of Foligno Nursing School, University of Perugia.

**Supporting Figures**


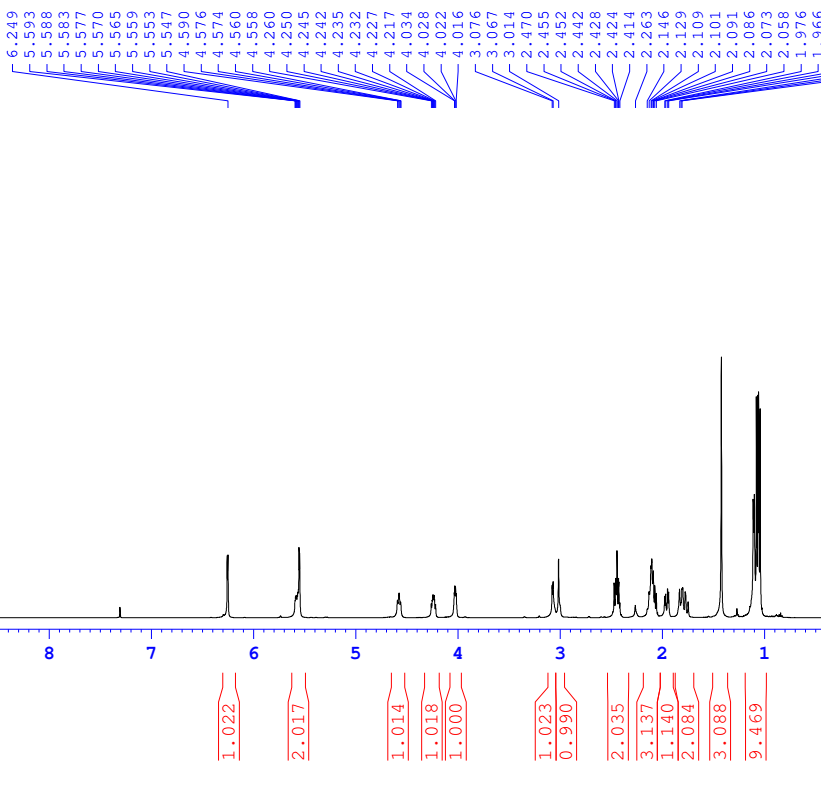


**Supporting Figure 1:** 1H NMR spectrum of tagitinin A (**1**) in CDCl3 (500 MHz)


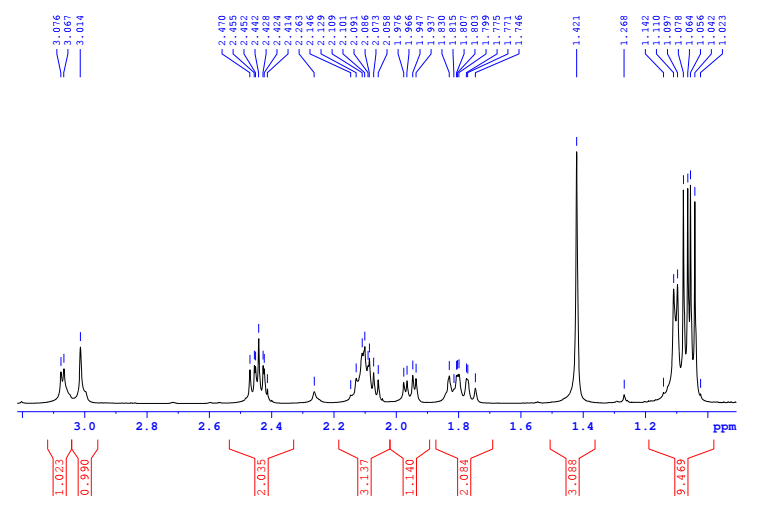
 **Supporting Figure 1A:** 1H NMR spectrum of tagitinin A (**1**) (from 3.08 to 1.0 ppm) in CDCl3 (500 MHz)


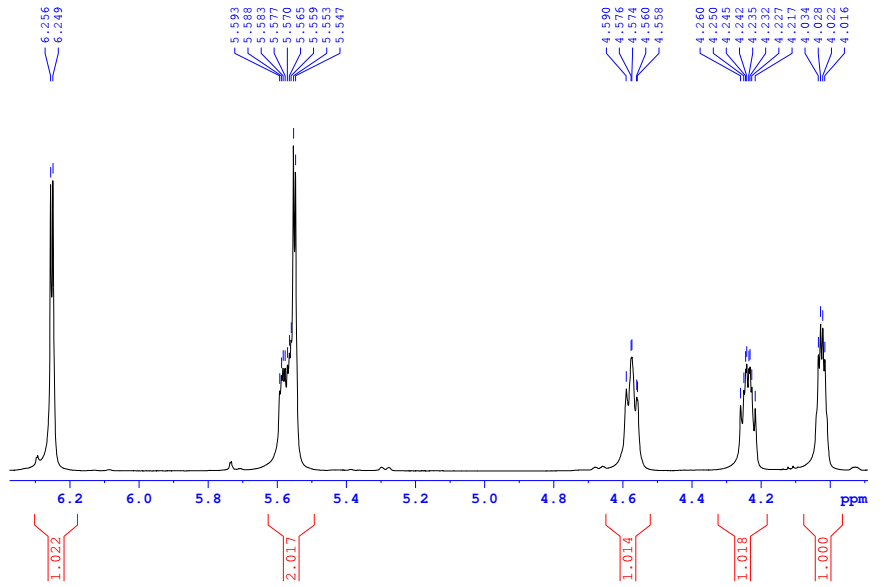


**Supporting Figure 1B:** 1H NMR spectrum of tagitinin A (**1)** (from 6.3 to 4.0 ppm) in CDCl3 (500 MHz)

**A)**


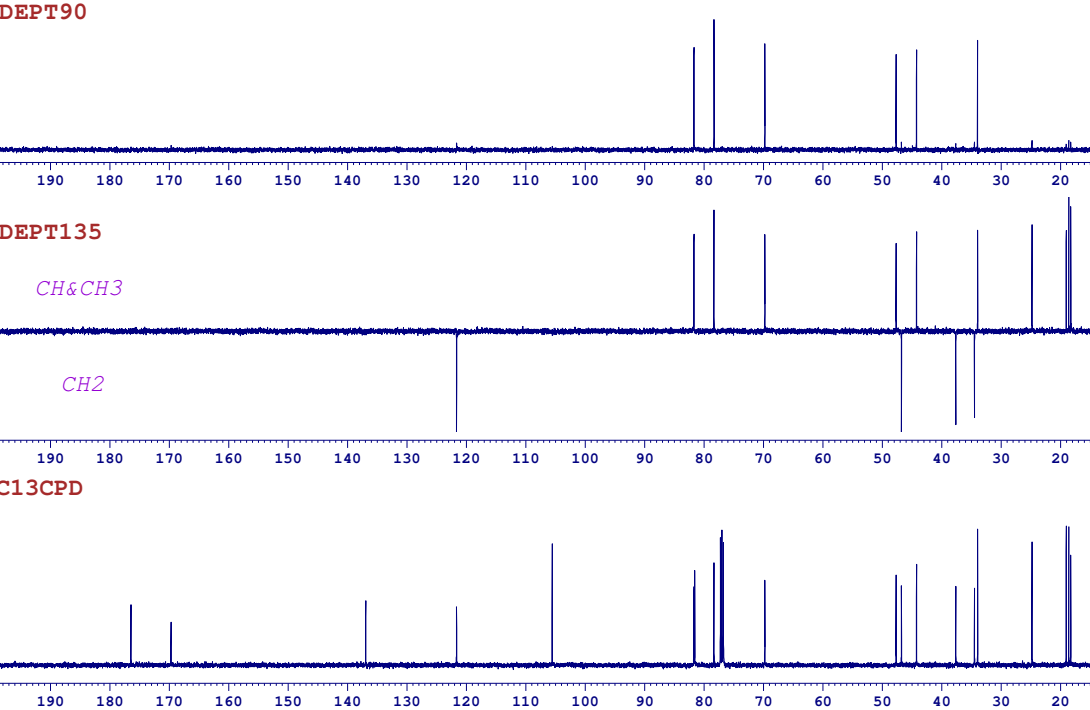


**B)**


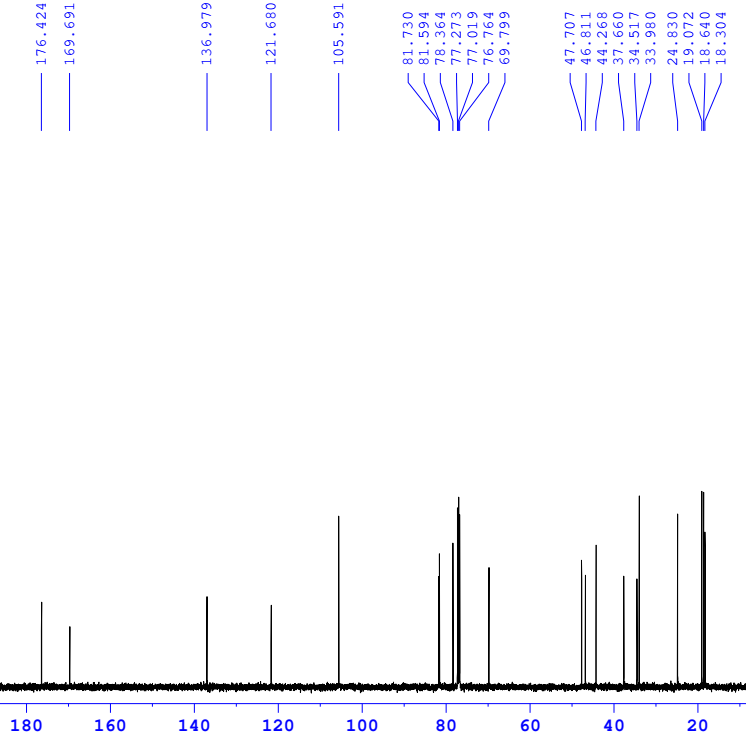


**Supporting Figure 2:** DEPT (A) and13C NMR (B) spectra of tagitinin A (**1**) in CDCl3 (125 MHz)


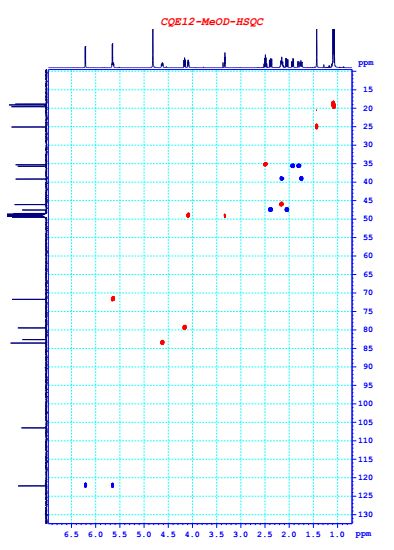


**Supporting Figure 3:** HSQC spectrum of tagitinin A (**1**) in CD3OD


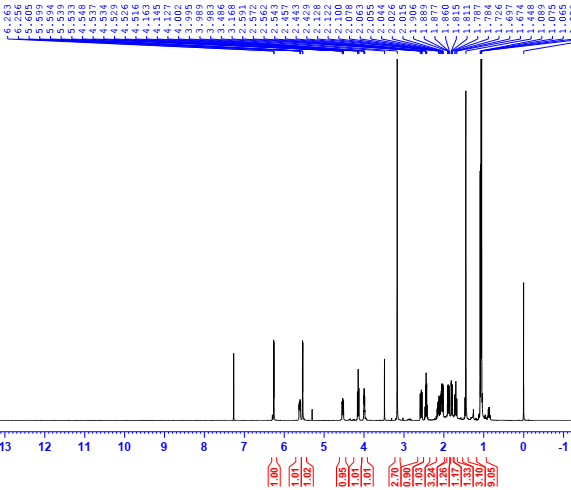


**Supporting Figure 4:** 1H NMR spectrum of 1*β-*hydroxytirotundin 3-O-methyl ether (**2**)in CDCl3 (500 MHz)


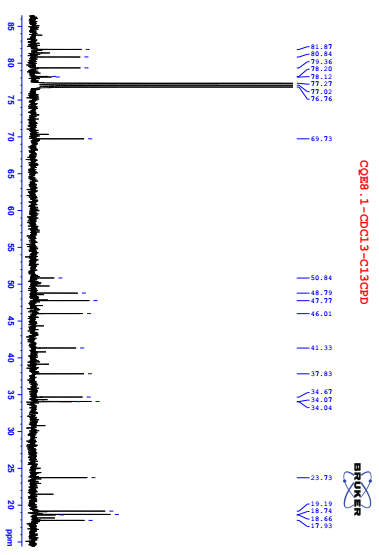


**Supporting Figure 5:** 13C NMR spectrum of 1*β*-hydroxytirotundin 3-O-methyl ether (**2**)inCDCl3 (125 MHz)


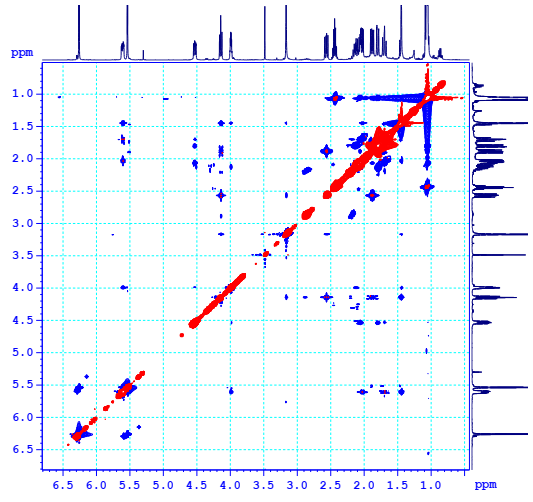


**Supporting Figure 6:** NOESYspectrum of 1*β*-hydroxytirotundin 3-O-methyl ether (**2**)inCDCl3


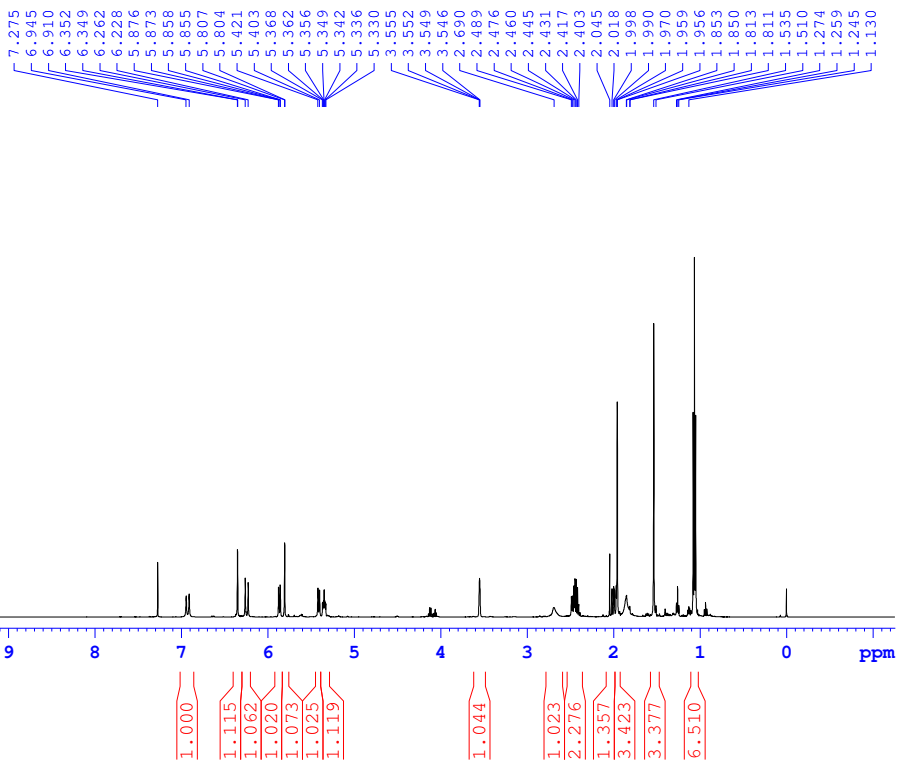


**Supporting Figure 7:** 1H NMR spectrum of tagitinin C (**3**) in CDCl3 (500 MHz)


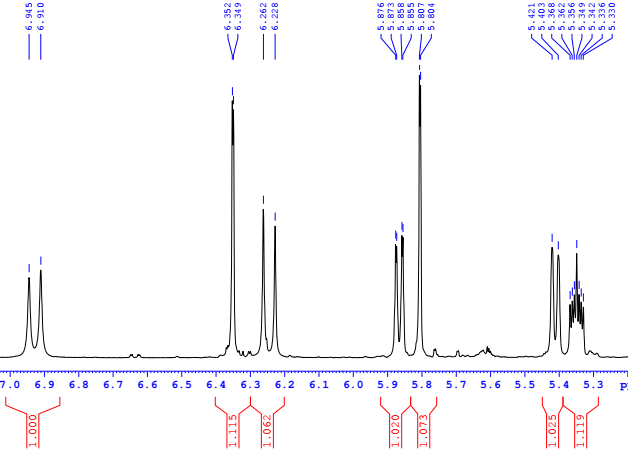


**Supporting Figure 7A:** 1H NMR spectrum (region from 6.9 to 5.3 ppm) of tagitinin C (**3**) in CDCl3


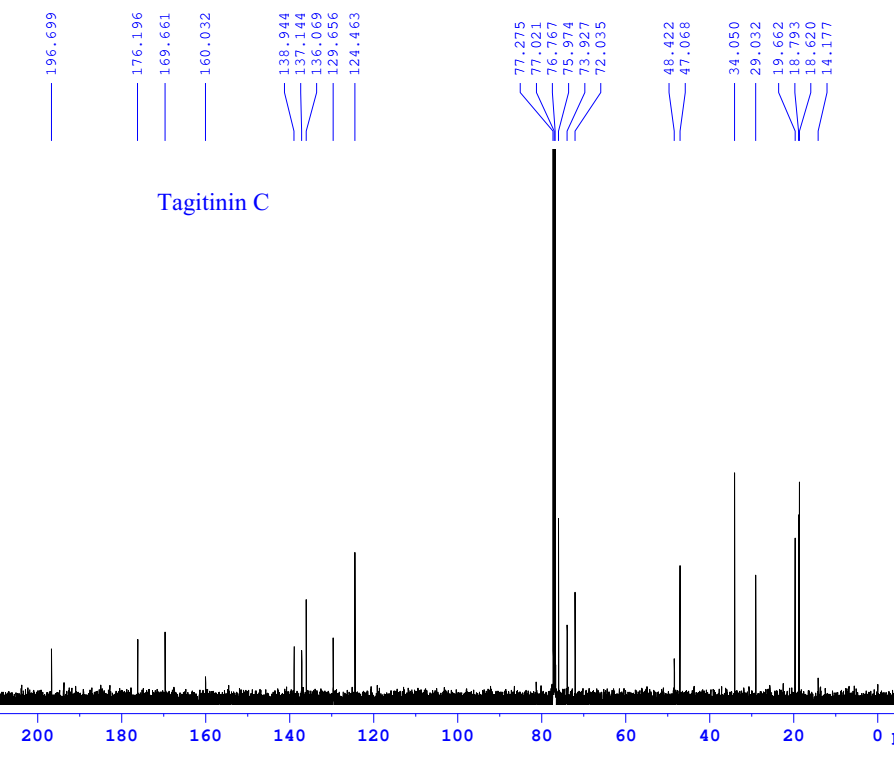


**Supporting Figure 8:** 13C NMR spectrum of tagitinin C (**3**) in CDCl3 (125 MHz)


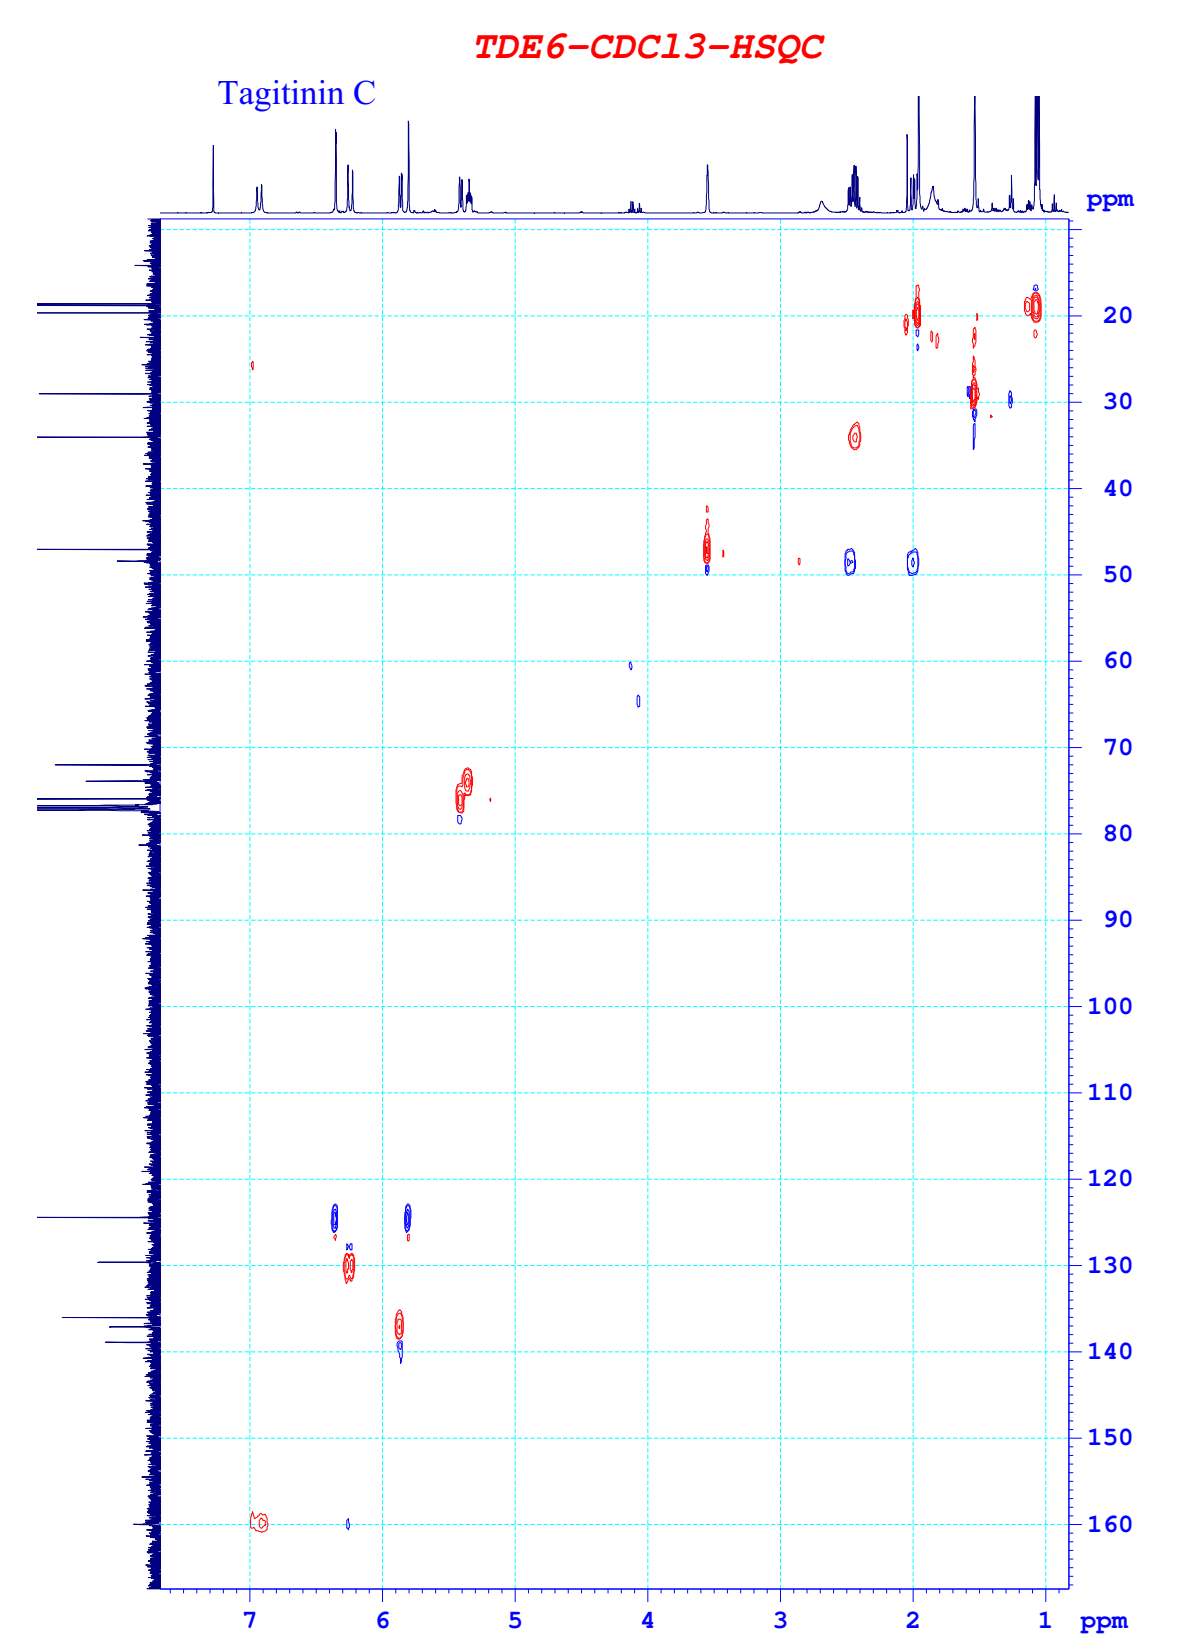


**Supporting Figure 9:** HSQC spectrum of tagitinin C (**3**) in CDCl3


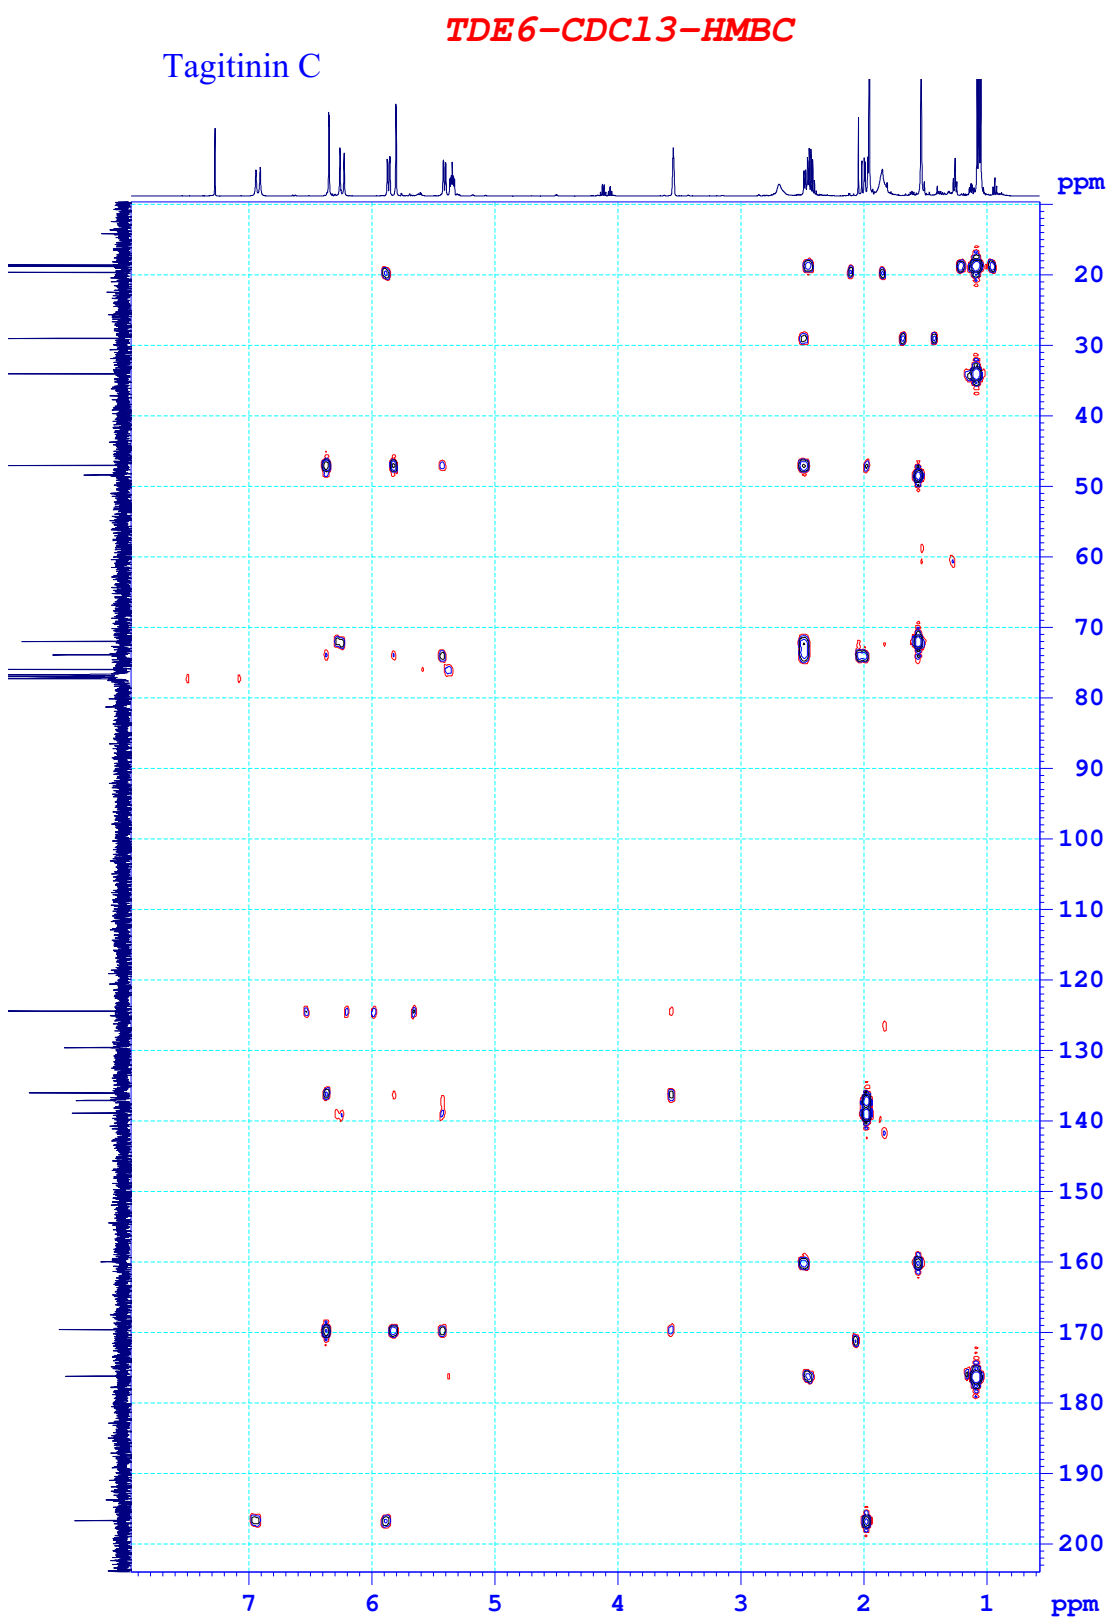


**Supporting Figure 10:** HMBC spectrum of tagitinin C (**3**) in CDCl3

**
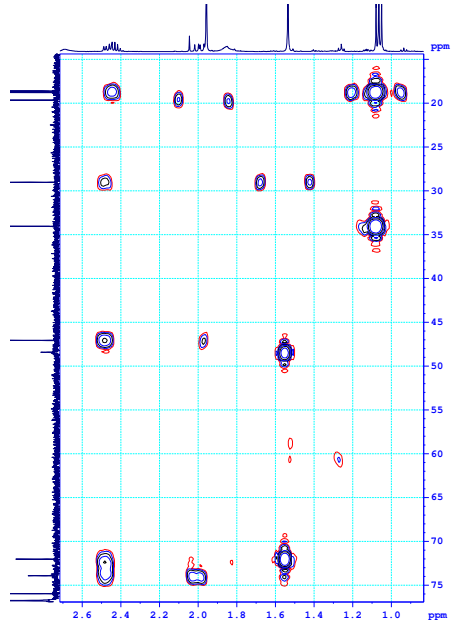
**

**Supporting Figure 10A:** HMBC spectrum (exspanse) of tagitinin C (**3**) in CDCl3
